# Supplementary material for: Deep sequencing of circulating exosomal microRNA allows non-invasive glioblastoma diagnosis
Source: PubMed Central journal article supplement (PMC6290767; doi:10.1038/s41698-018-0071-0), 2018-12-12

**Supplementary Fig. 1: Ingenuity Pathway Analysis revealed significant overlap with Glioblastoma signaling pathway ( $p$ -value= $3.36E^{-12}$ )**

- Gene mutations associated with glioblastoma multiforme:
- APC
  - AXIN
  - GSK3 $\beta$
  - IGF1R
  - PDGFR
  - EGFR
  - Rb
  - p14ARF
  - PTEN

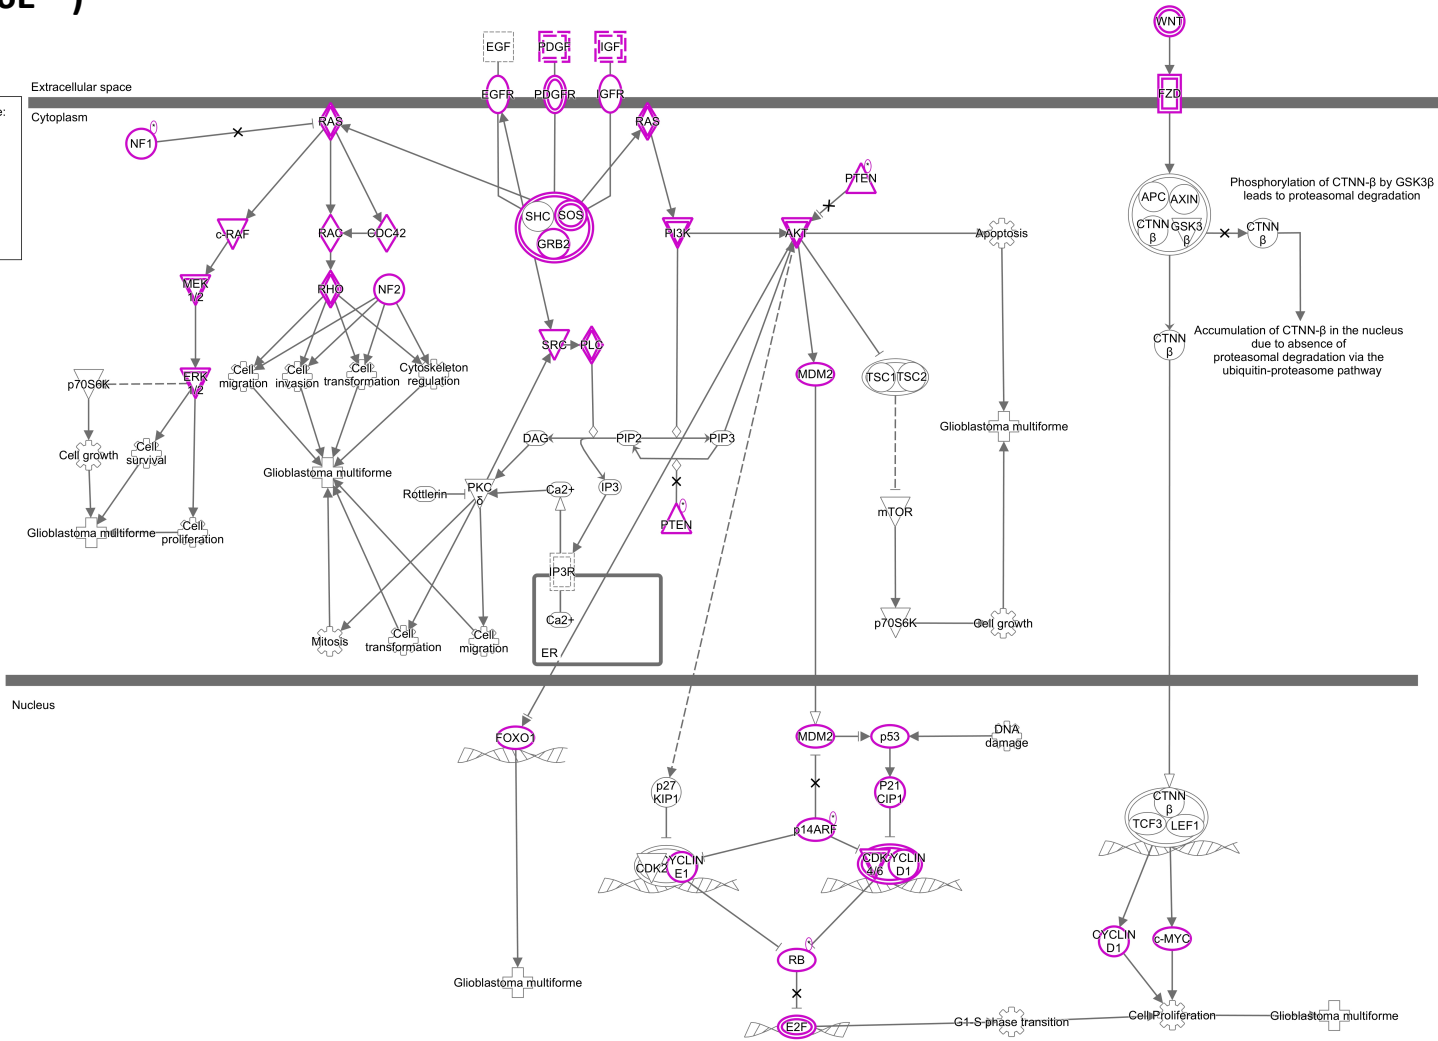

*Glioblastoma signaling pathway annotated with molecules targeted by significant, differentially expressed exosomal miRNAs (in magenta).*

**Supplementary Fig. 2A: Box-and-whisker plots, differentially expressed miRNAs in GBM vs. healthy controls**

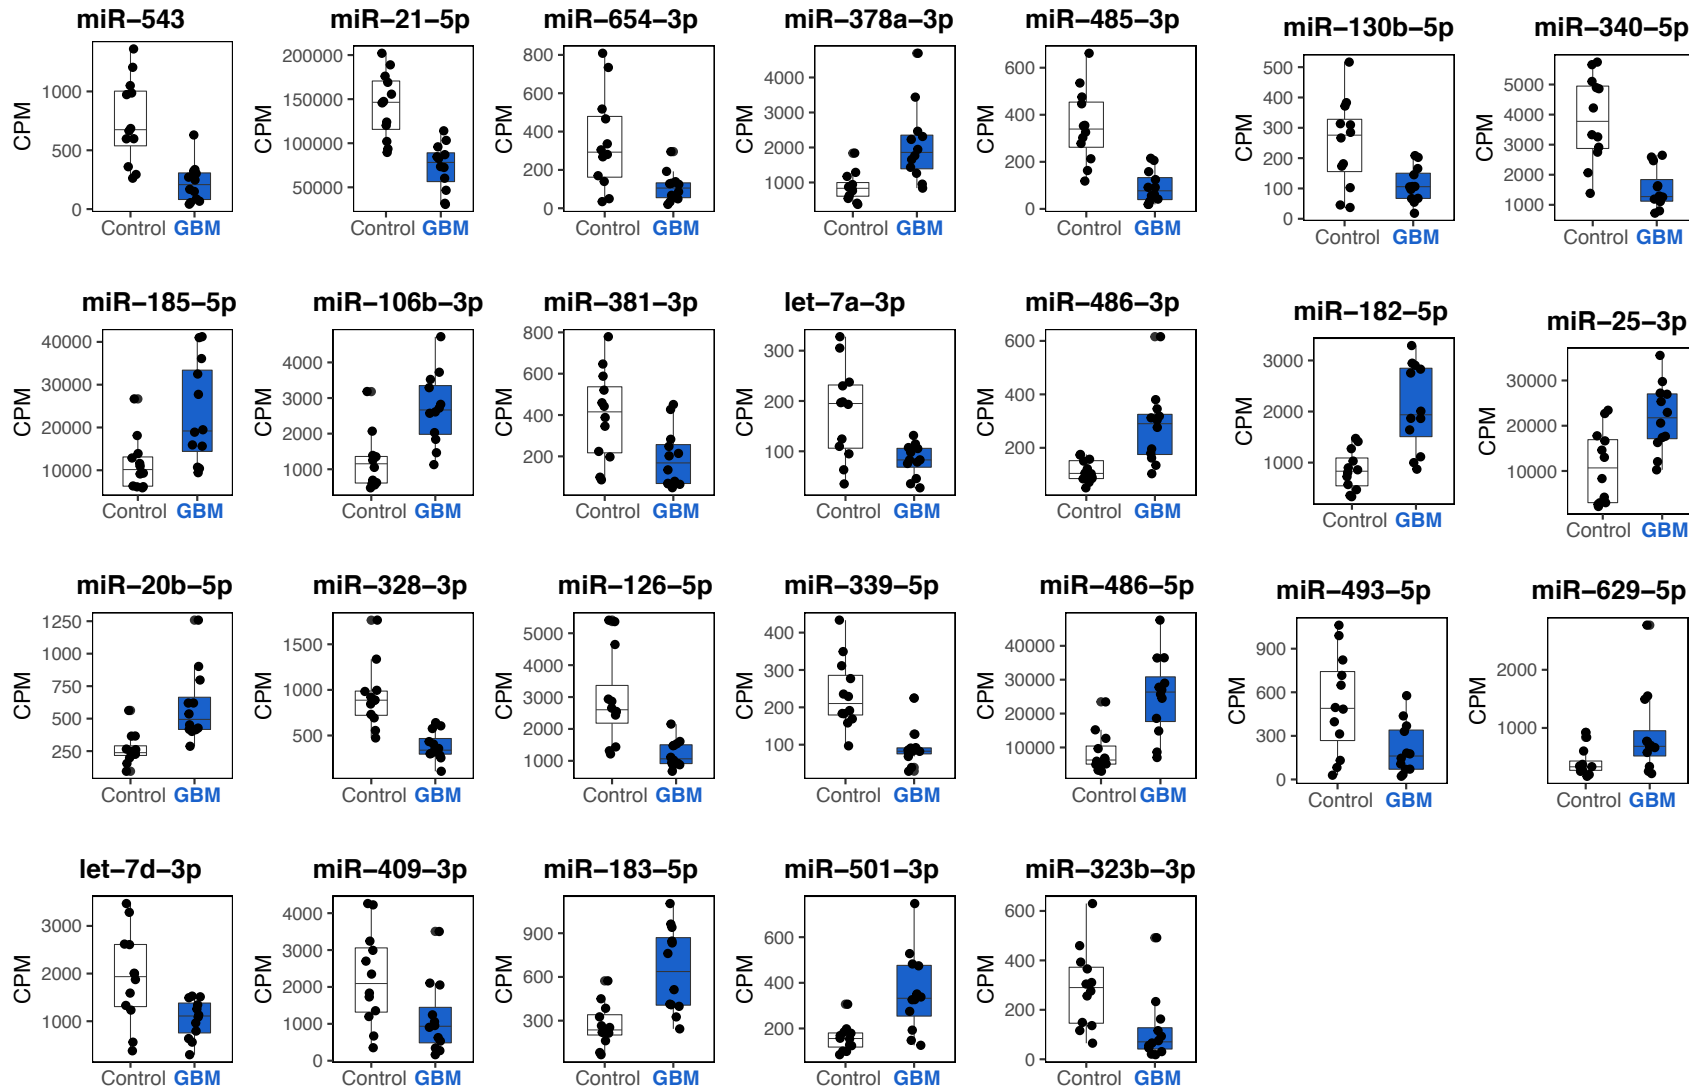

Supplementary Fig. 2B: ROC curves, differentially expressed miRNAs in GBM vs. healthy controls

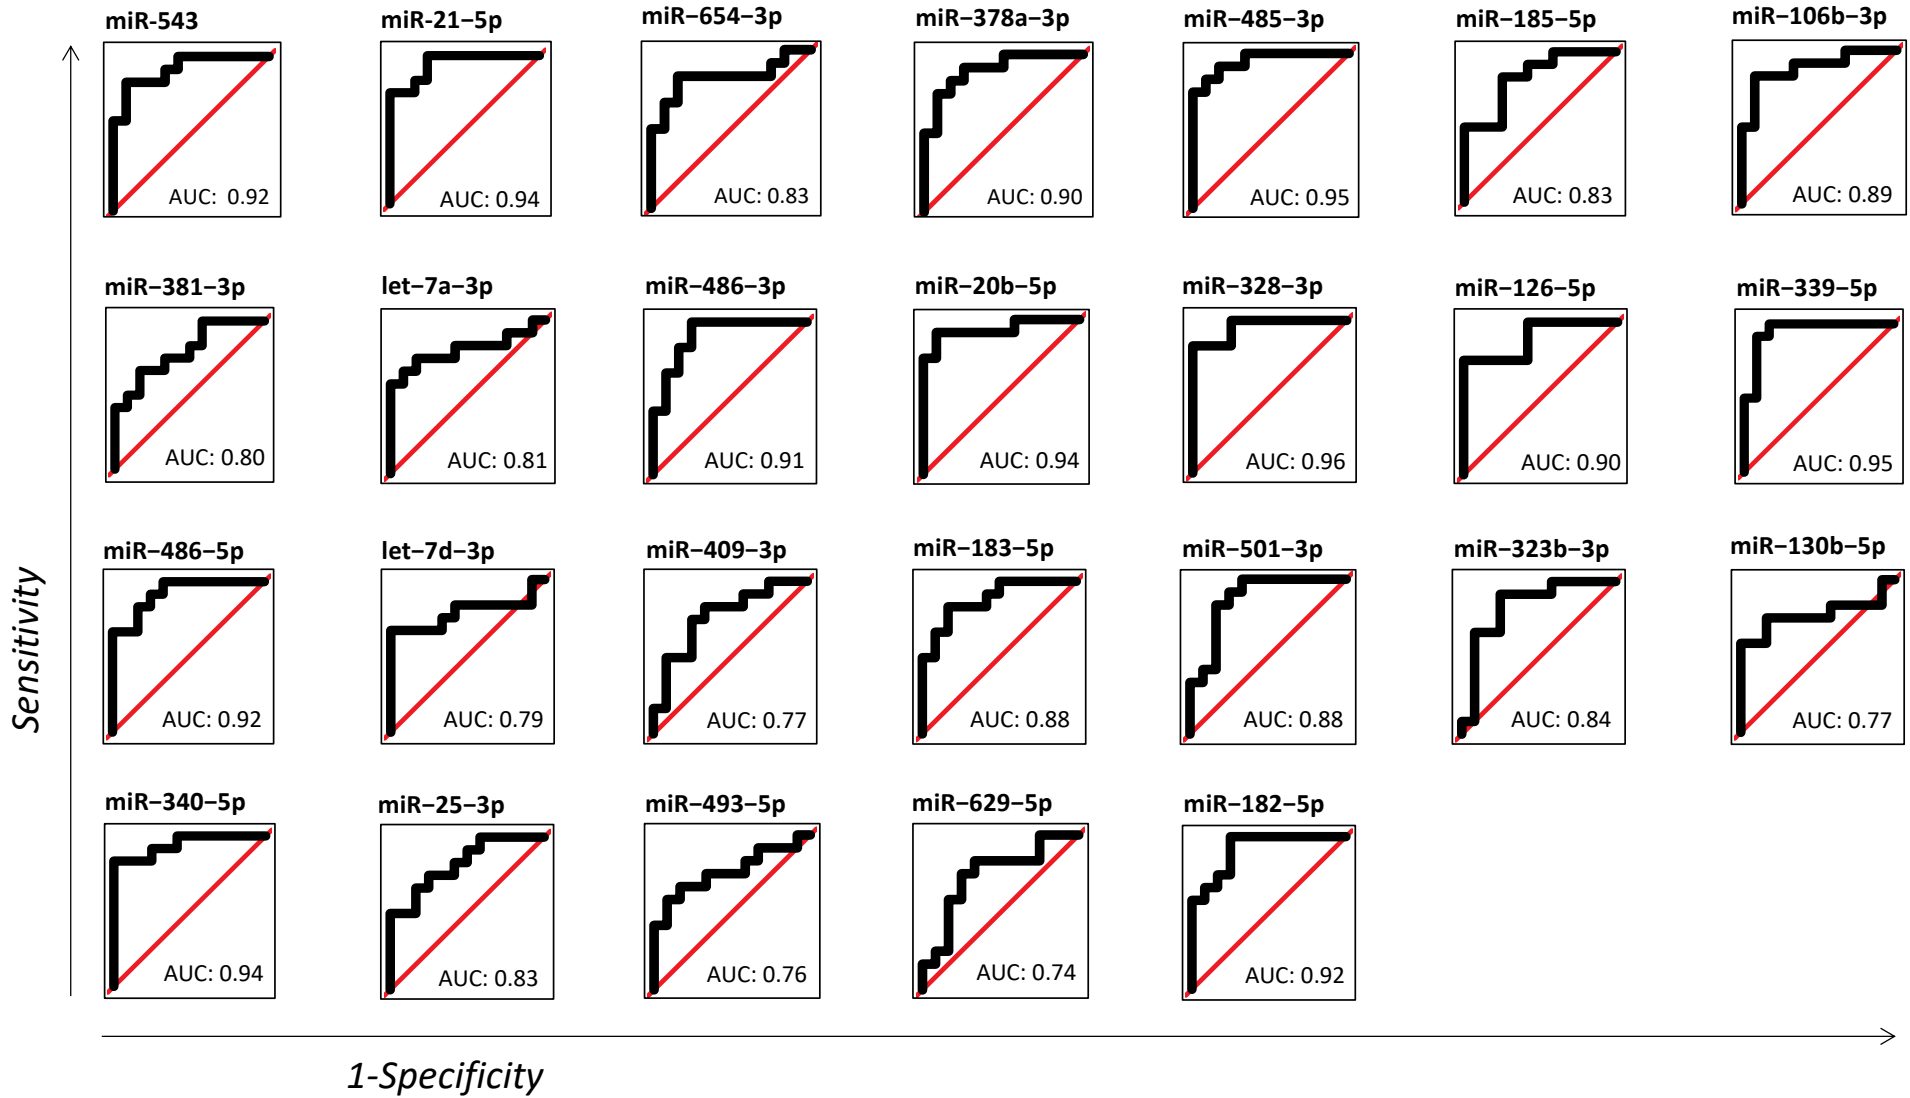

Supplementary Fig. 3A: Box-and-whisker plots, differentially expressed miRNAs in GII-III vs. healthy controls

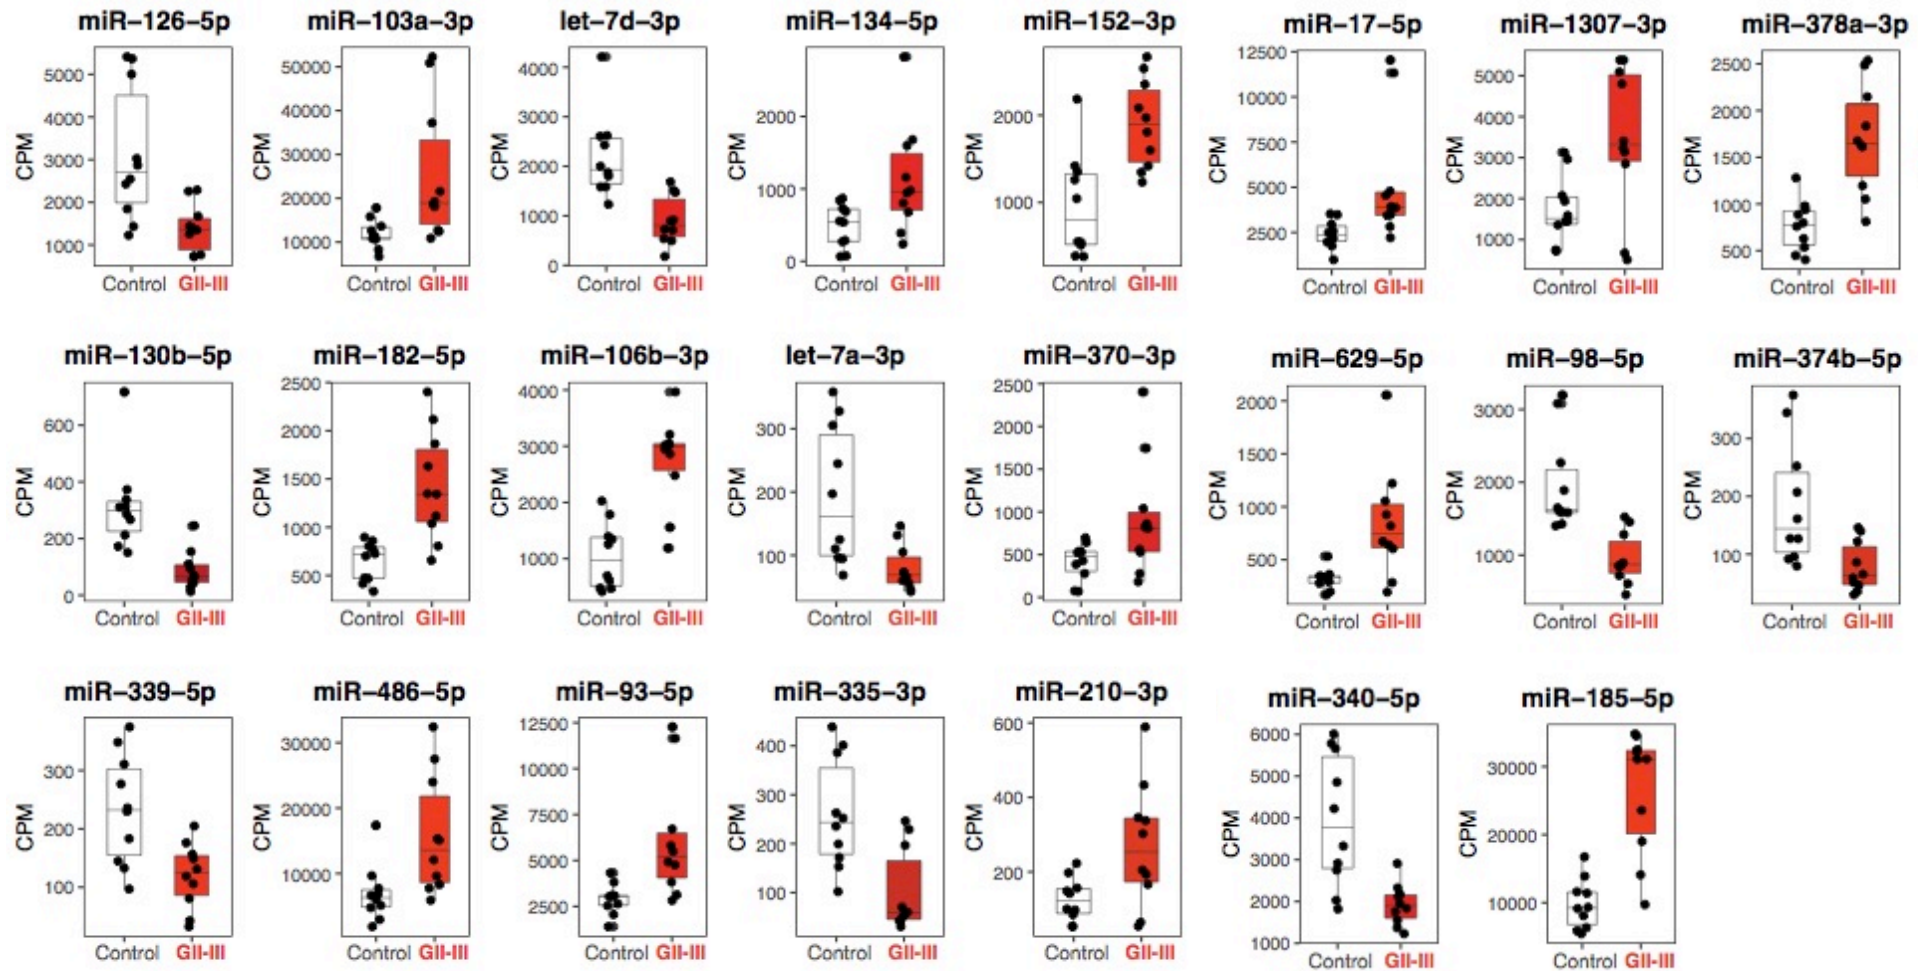

Supplementary Fig. 3B: ROC curves, differentially expressed miRNAs in GII-III vs. healthy controls

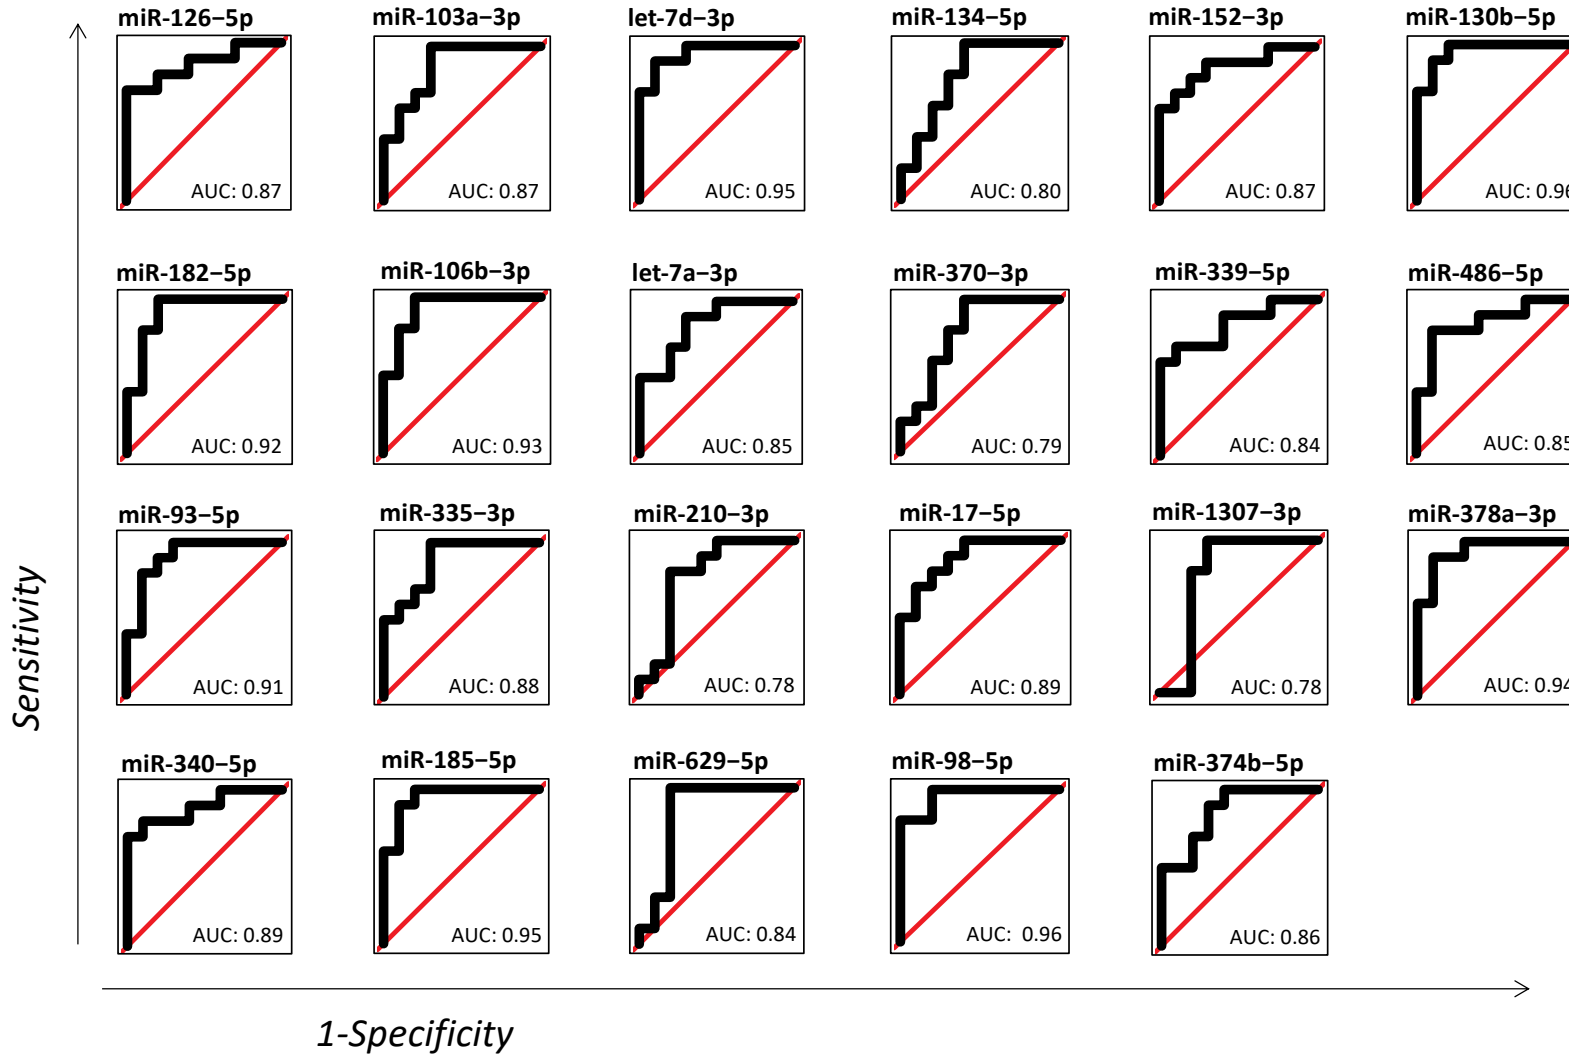

### Supplementary Fig. 3C: Partitioning and Random Forest Modeling to select stable miRNAs for GII-III vs. healthy controls

Random Forest after partitioning,  
Importance of Contribution

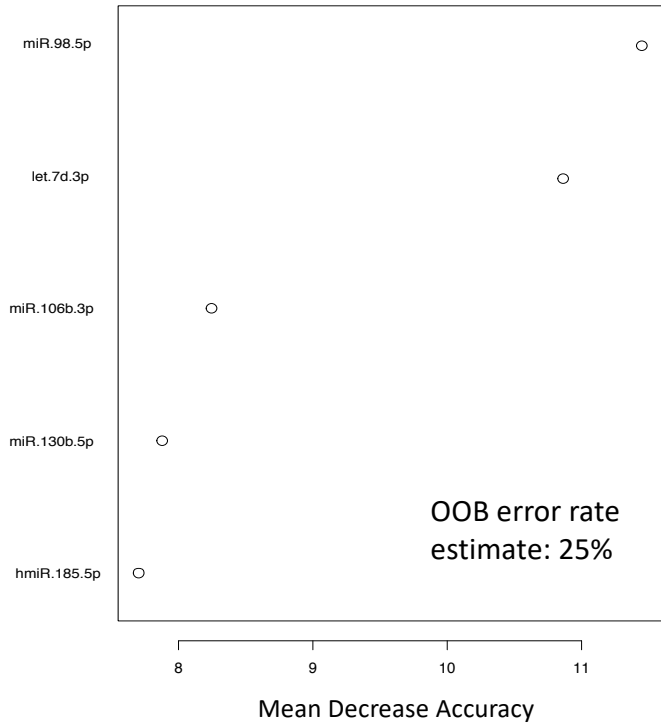

Violin plot of error distributions of stratified miRNA signature size

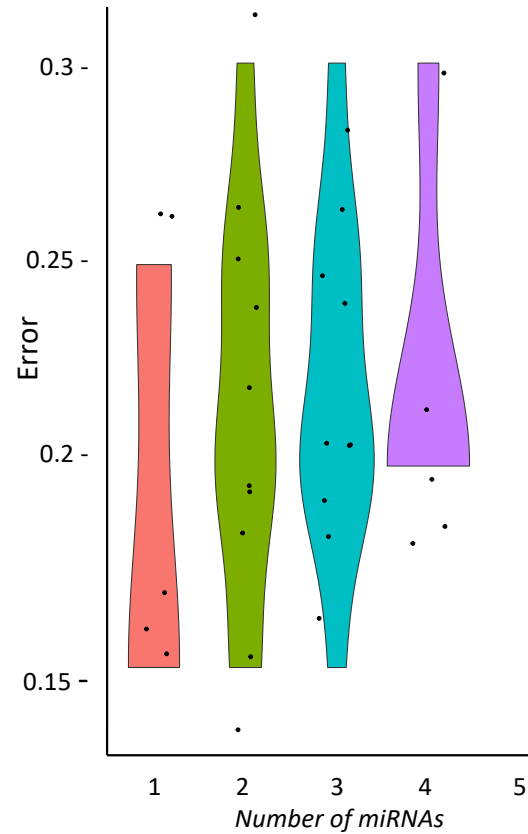

Combinations of miRNAs with lowest OOB error rate

| # miRNA | miRNA combination        | Error |
|---------|--------------------------|-------|
| 2       | miR-106b-3p, miR-98-5p   | 0.132 |
| 2       | miR-106b-3p, miR-130b-5p | 0.158 |

**Supplementary Fig. 4A: Box-and-whisker plots, differentially expressed miRNAs in GII-III vs. GBM**

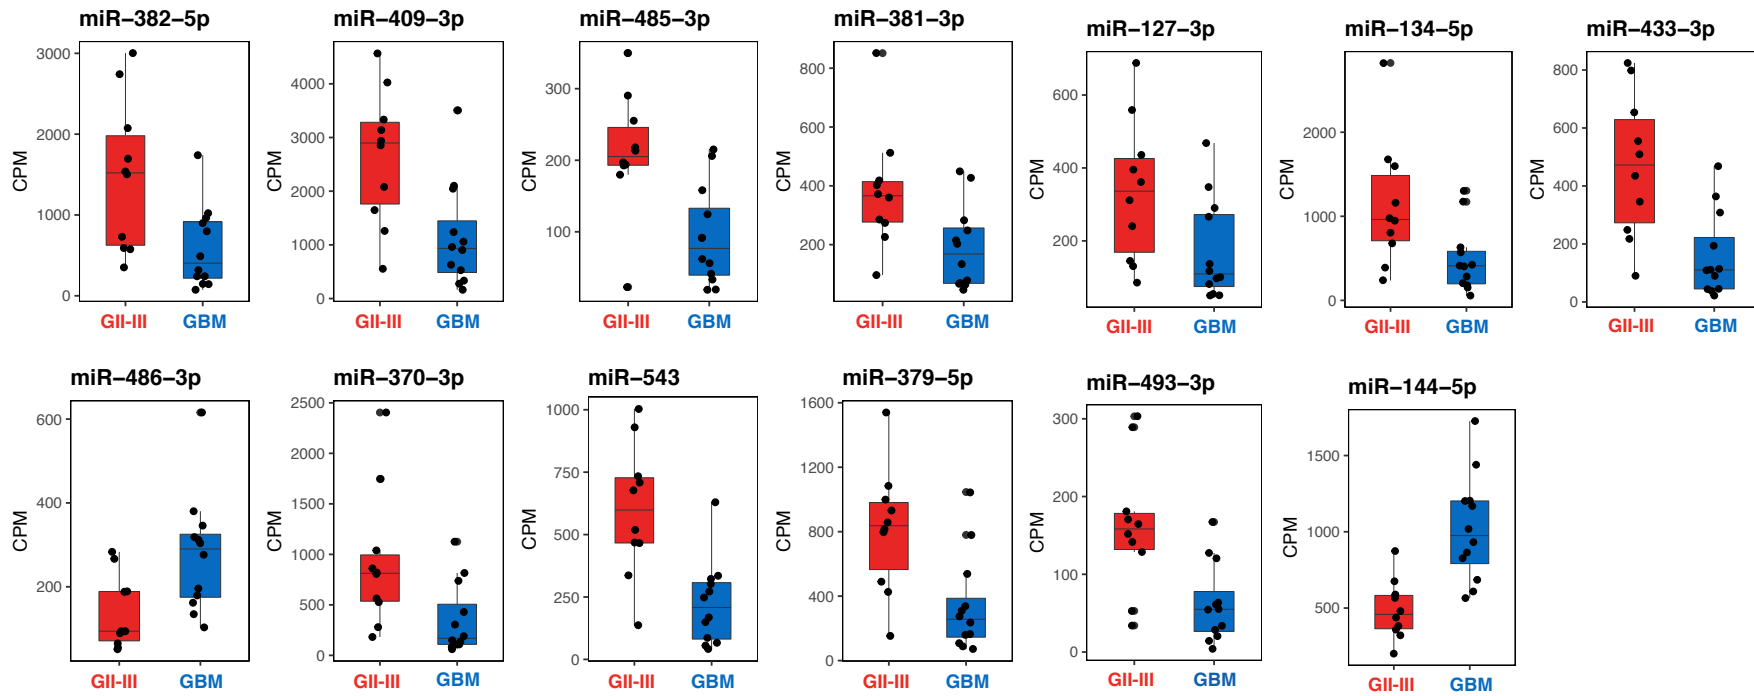

Supplementary Fig. 4B: ROC curves, differentially expressed miRNAs in GII-III vs. GBM

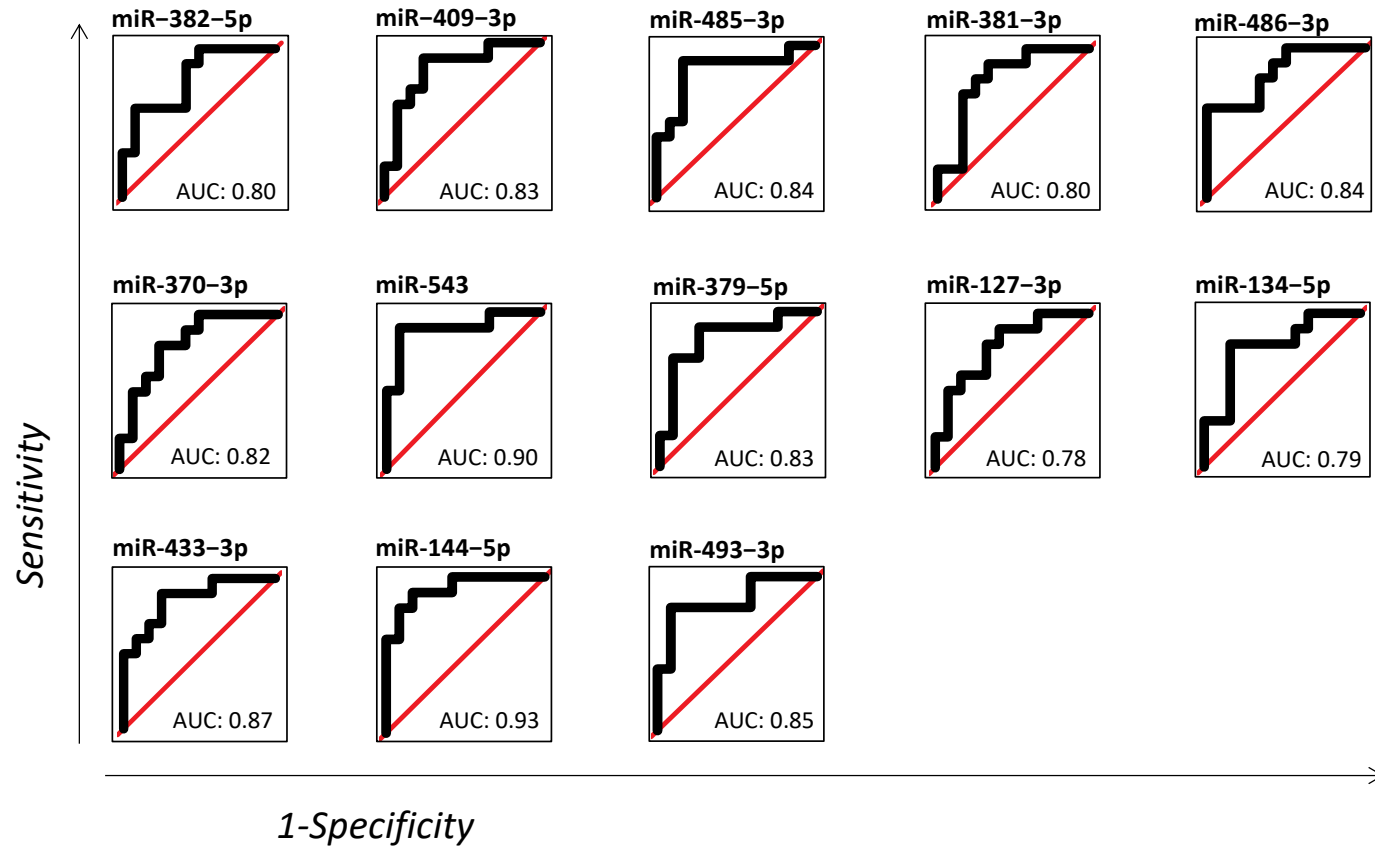

Supplement: 41698_2018_71_MOESM1_ESM.pdf [file 41698_2018_71_MOESM1_ESM.pdf]
